# Supplementary material for: Management and Burden of Acute Migraine at the Emergency Department in Southwest China: a Retrospective Study
Source: Research Square preprint supplement (doi:10.21203/rs.3.rs-842221/v1), 2021-09-02
Supplement: Supplementary file 1 [file 02d3c8e7fb4f6f897b3fe2f2.xlsx]

## Sheet: 工作表 1 - Table 2 Final diagnosis
Table 2 Final diagnosis of include patients according to ICHD-3
Diagnosis	Number of patients （%）	neurology referral
migraine without aura	294（98.0%）	21
migraine with aura	0	0
Chronic migraine	2（0.6%）	0
Vestibular migraine	4（1.3%）	2
